# Supplementary material for: Gut microbiome composition differences among breeds impact feed efficiency in swine
Source: PubMed Central journal article supplement (PMC7376719; doi:10.1186/s40168-020-00888-9), 2020-07-22
Supplement: 40168_2020_888_MOESM1_ESM.pdf [file 40168_2020_888_MOESM1_ESM.pdf]

**Additional file 1.** Descriptive statistics for efficiency and fatness traits.

| Item                      | Duroc   |       | Landrace |       | Large White |       |
|---------------------------|---------|-------|----------|-------|-------------|-------|
|                           | Mean    | SD    | Mean     | SD    | Mean        | SD    |
| Animals, n                | 190     |       | 221      |       | 204         |       |
| <i>Efficiency traits:</i> |         |       |          |       |             |       |
| ADFI, g/d                 | 2,154.1 | 326.1 | 2,203.2  | 360.3 | 2,384.5     | 354.2 |
| ADG, g/d                  | 615.2   | 68.2  | 628.3    | 75.4  | 650.9       | 82.1  |
| RF1, g                    | 0.00    | 341.2 | 0.00     | 287.0 | 0.00        | 287.1 |
| RF2, g                    | 0.00    | 307.8 | 0.00     | 279.5 | 0.00        | 263.8 |
| FCR                       | 3.53    | 0.54  | 3.51     | 0.58  | 3.67        | 0.45  |
| <i>Fatness traits:</i>    |         |       |          |       |             |       |
| Back fat, mm              | 10.12   | 2.63  | 11.69    | 2.95  | 14.04       | 3.20  |
| Loin depth, mm            | 49.08   | 6.63  | 48.52    | 6.73  | 47.07       | 6.59  |
| IMF, %                    | 2.09    | 0.89  | 1.84     | 0.75  | 1.93        | 0.79  |

ADFI = average daily feed intake; ADG = average daily gain; RF1 = residuals calculated regressing ADFI on ADG; RF2 = residuals calculated regressing ADFI on ADG and body weight; FCR = average feed conversion ratio calculated as the ratio between ADFI and ADG; IMF = intramuscular fat.
