# Supplementary material for: Gut microbiome composition differences among breeds impact feed efficiency in swine
Source: PubMed Central journal article supplement (PMC7376719; doi:10.1186/s40168-020-00888-9), 2020-07-22

# Average Daily Gain

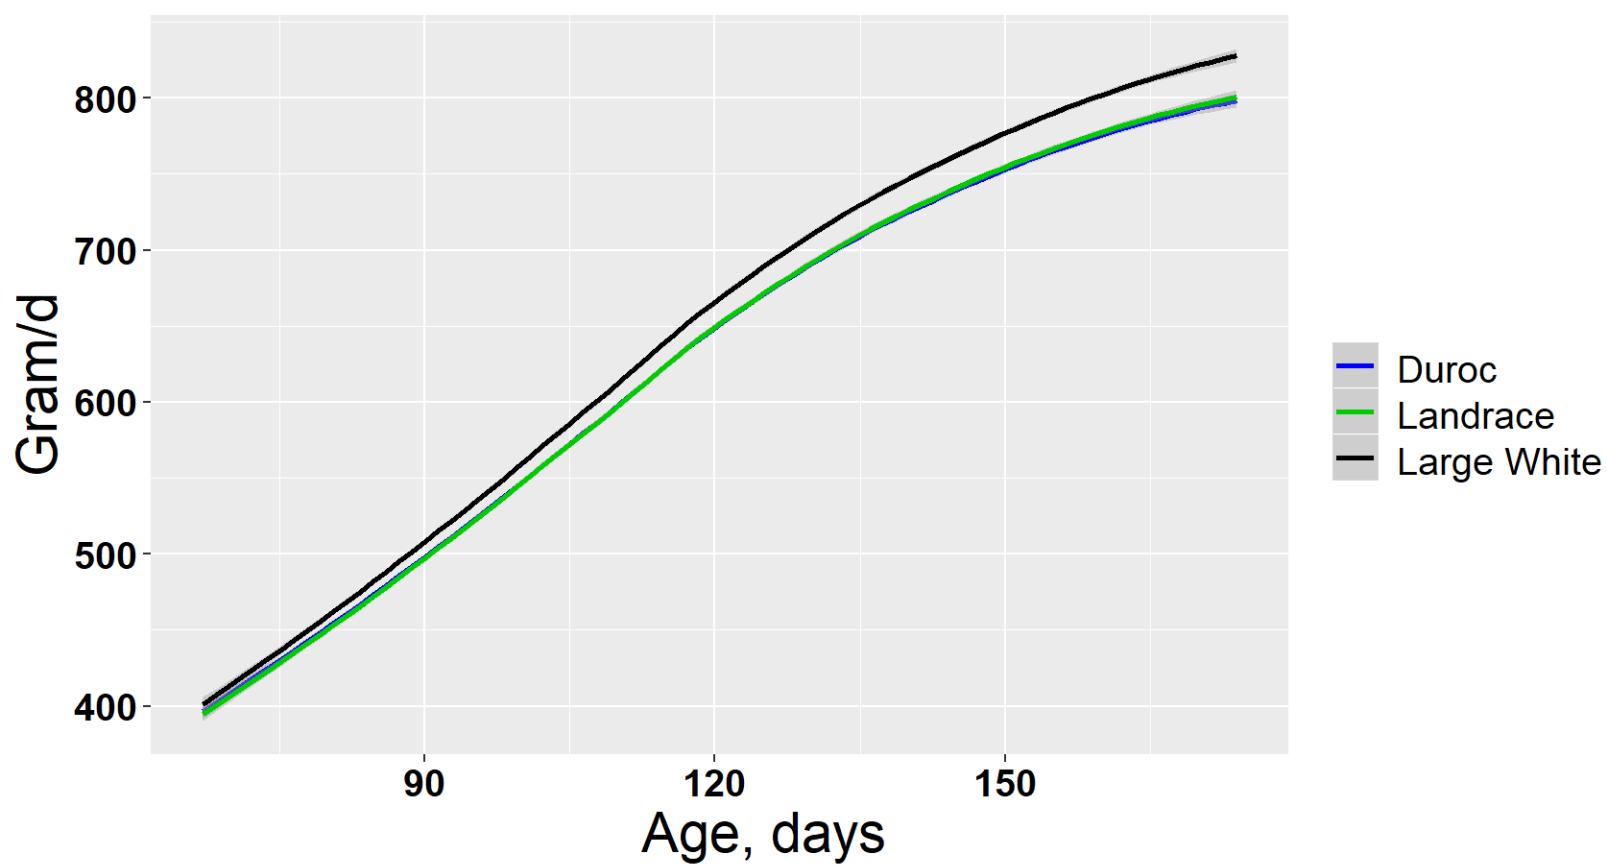

Supplement: 40168_2020_888_MOESM11_ESM.pdf [file 40168_2020_888_MOESM11_ESM.pdf]
